# Supplementary material
Source: PubMed Central journal article supplement (PMC2701381)
Supplement: NIHMS95153-supplement-01.pdf [file NIHMS95153-supplement-01.pdf]

Cancer Cell, Volume 15

**Supplemental Data**

**Article**

**mTOR Complex 2 Is Required for the Development  
of Prostate Cancer Induced by *Pten* Loss in Mice**

**David A. Guertin, Deanna M. Stevens, Maki Saitoh, Stephanie Kinkel, Katherine Crosby,  
Joon-Ho Sheen, David J. Mullholland, Mark A. Magnuson, Hong Wu, and David M. Sabatini**

**A**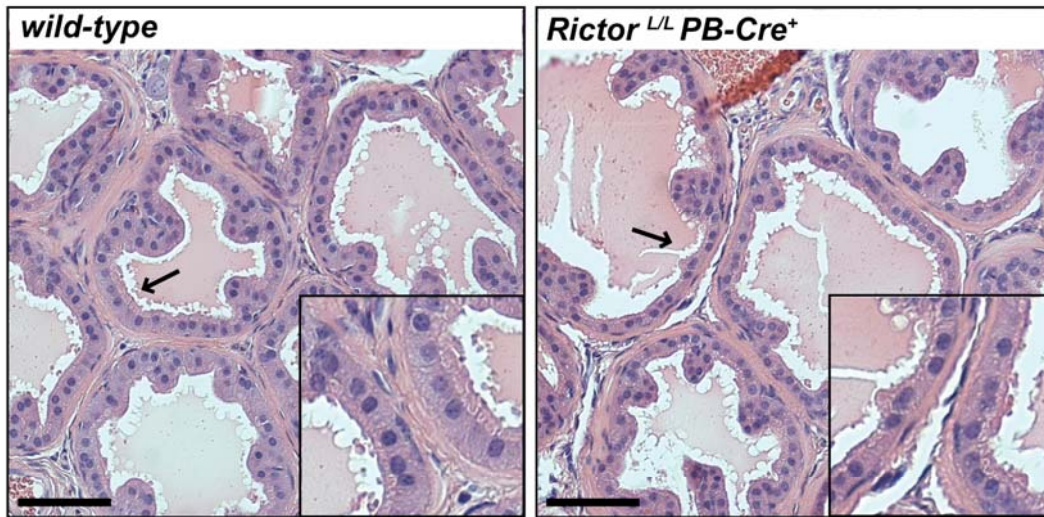**B**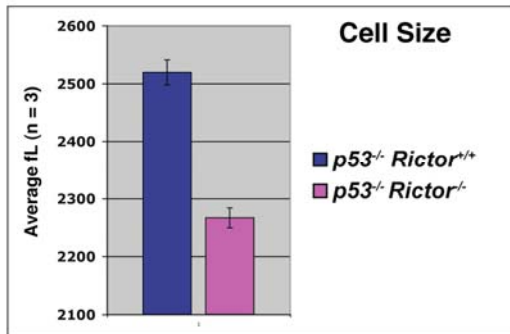**C**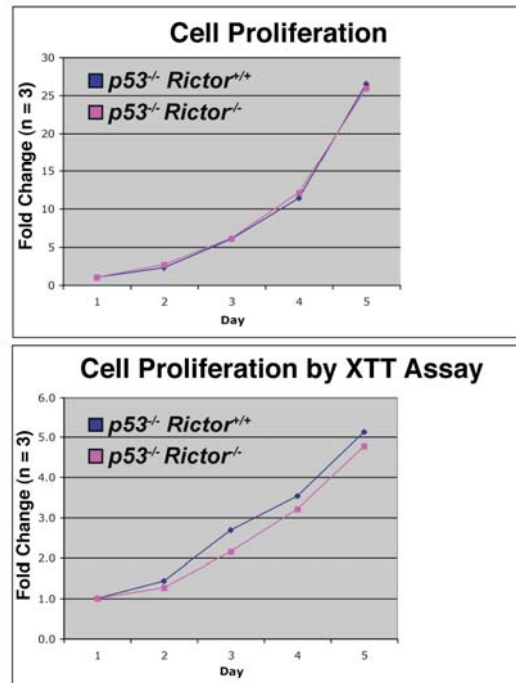

### Figure S1. *Rictor* Deletion Results in Smaller Cells but Not in a Proliferation Defect

(A) Example of wild-type and  $Rictor^{L/L} PB-Cre^+$  tissue stained with H&E. The arrows mark the sections boxed by the inserts. Scale bar = 50 $\mu$ m. (B-C) MEFS immortalized by p53 deletion and null for *Rictor* are smaller than litter matched  $p53^{-/-}$  MEFS wild-type for *Rictor*, but they proliferate at the same rate.

(B) Triplicate measurements of cell size (fL) were made using a Coulter counter. Error bars = SD.

(C) Cells were seeded at equal density and cell number was measured on 5 consecutive days using a Coulter Counter (top) or using an XTT assay kit (bottom; Roche). Fold change derived from 3 experiments is shown.

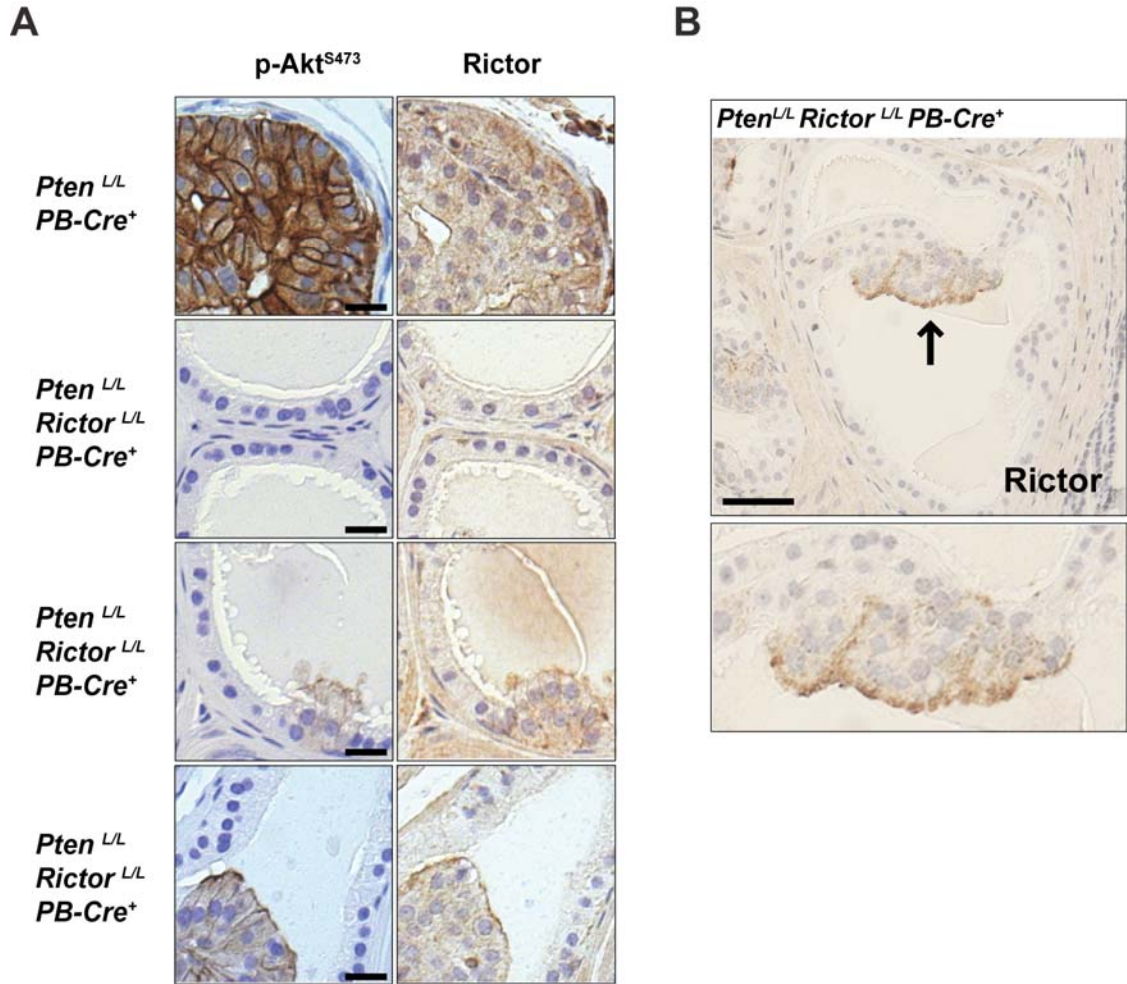

### Figure S2. Rictor Immunohistochemistry

(A) Additional examples of Rictor labeling. In each case, Rictor signal correlates with Akt<sup>S473</sup> phosphorylation. Scale bar = 25 $\mu$ m.

(B) Rictor localizes to the membrane. Shown is a patch of abnormal cells from *Pten*<sup>LoxP/LoxP</sup> *Rictor*<sup>LoxP/LoxP</sup> *PB-Cre*<sup>+</sup> prostate tissue staining positive for Rictor with a noticeable concentration of Rictor protein near the luminal edge of the cells (arrow). The indicated cells are enlarged in the bottom box. Scale bar = 25 $\mu$ m.

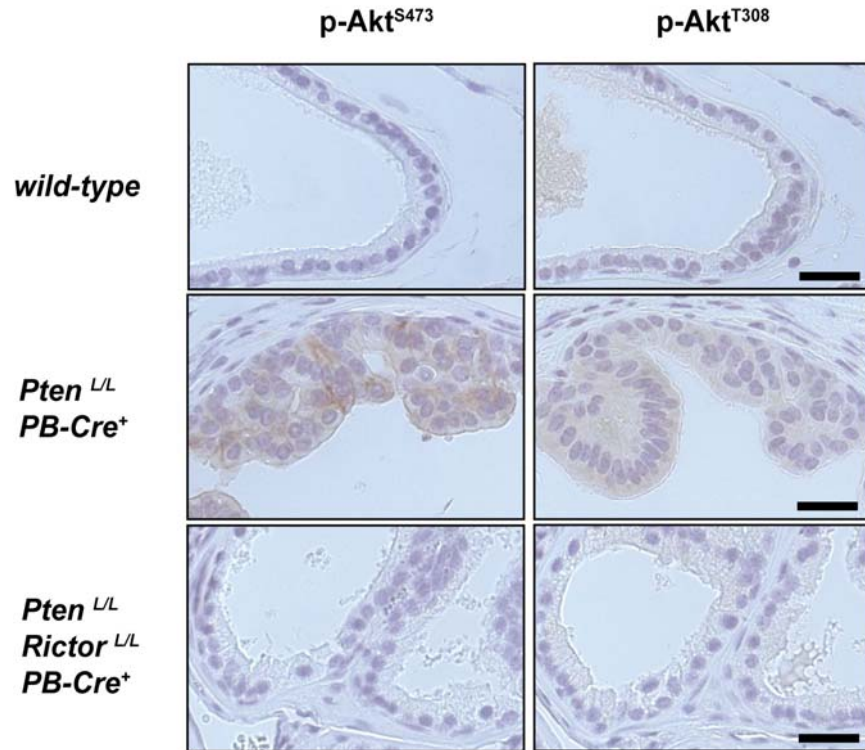

**Figure S3. Phospho-Akt<sup>T308</sup> Immunohistochemistry**

Labeling of wild-type, *Pten*<sup>LoxP/LoxP</sup>*PB-Cre*<sup>+</sup>, and *Pten*<sup>LoxP/LoxP</sup>*Rictor*<sup>LoxP/LoxP</sup>*PB-Cre*<sup>+</sup> prostate tissue with a phospho-Akt<sup>T308</sup> antibody in development for IHC. Scale bar = 25 $\mu$ m.
